# Supplementary material for: High Resolution Analysis of DMPK Hypermethylation and Repeat Interruptions in Myotonic Dystrophy Type 1
Source: MDPI journal article supplement (doi:10.3390/genes13060970), 2022-05-28
Supplement: s1 [file s1]

Supplementary Table S1: Cas9 probes (Grch38).

|               |                      |                              |         |
|---------------|----------------------|------------------------------|---------|
| DMPK_5mC_US_1 | ACCCAAGGCTCGCCCAATAG | chr19: 45,763,842-45,763,861 | +strand |
| DMPK_5mC_US_2 | GGGGAGAGCGGTACCACTTG | chr19: 45,766,586-45,766,605 | +strand |
| DMPK_5mC_DS_1 | GACGAGGTTACTTCAGACAT | chr19: 45,772,492-45,772,511 | -strand |
| DMPK_5mC_DS_2 | GGACCTGCGAGTCACACAAC | chr19: 45,783,548-45,783,567 | -strand |

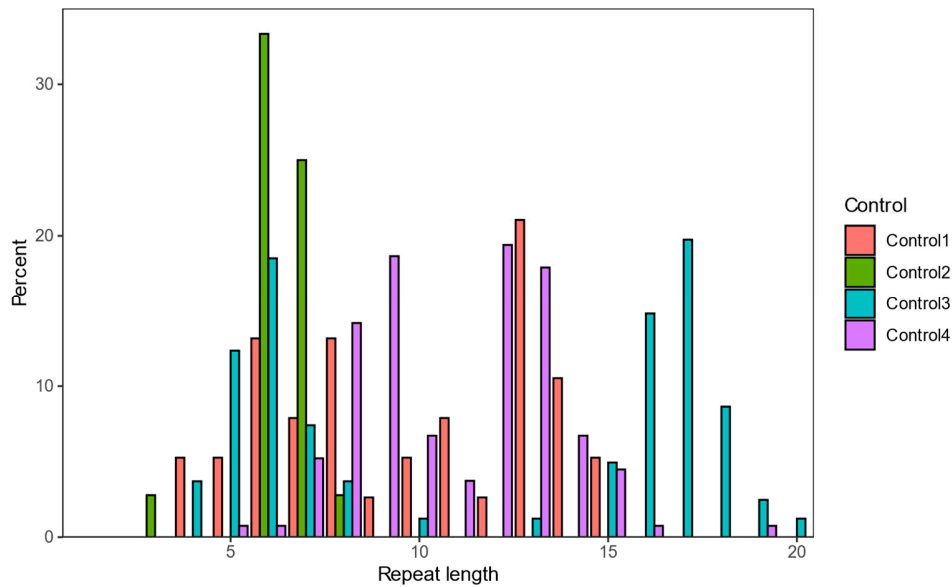

Supplementary Figure S1: Repeat lengths for all four controls.

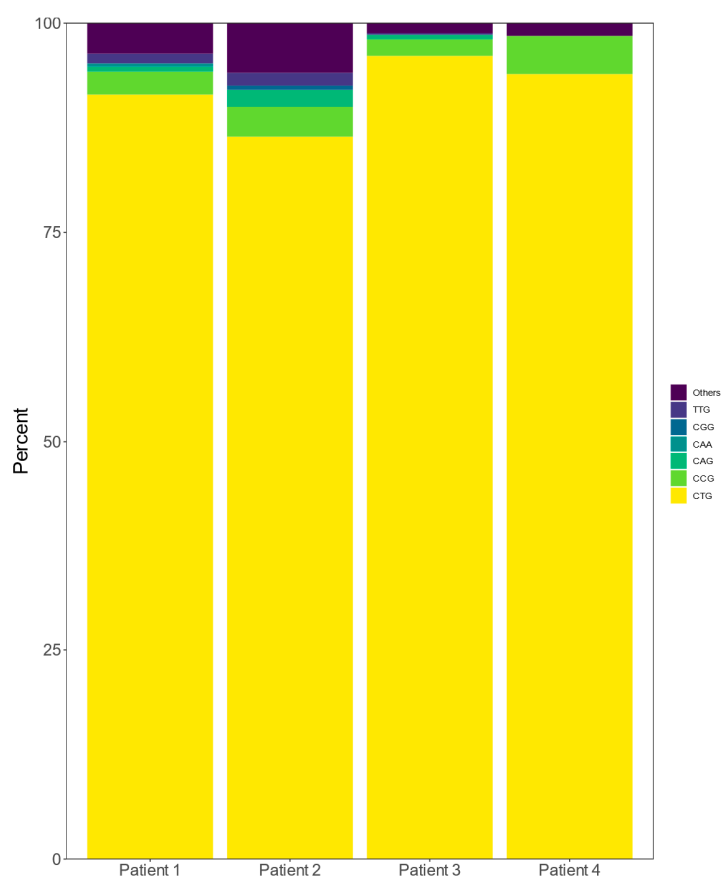

**Supplementary Figure S2:** *Distribution of most common triplets in the healthy alleles of each patient.*

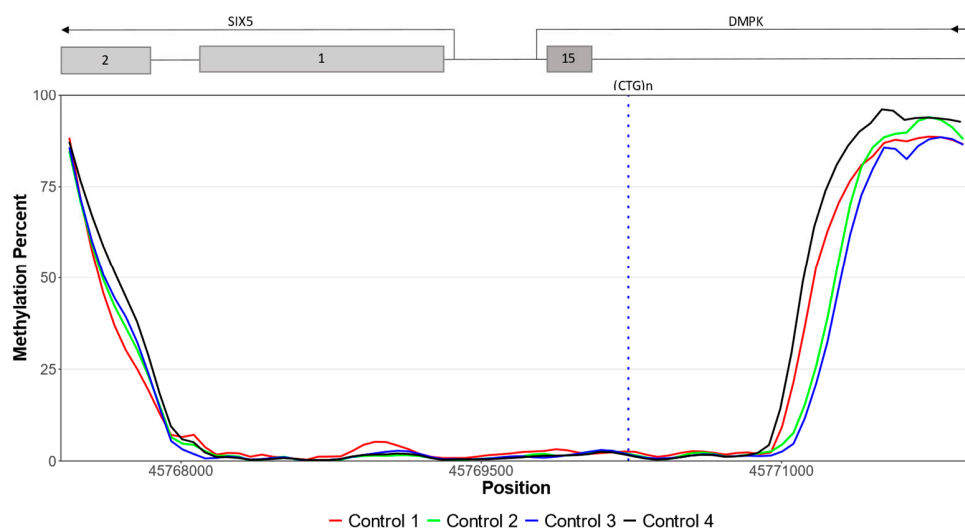

**Supplementary Figure S3:** Nanopore methylation profiles for the controls. The y-axis represents the methylation level in percent and the x-axis represents the genomic position. The position of the CTG repeat is marked with a blue stippled line and the approximate positions of nearby genes are indicated at the top of the plot.

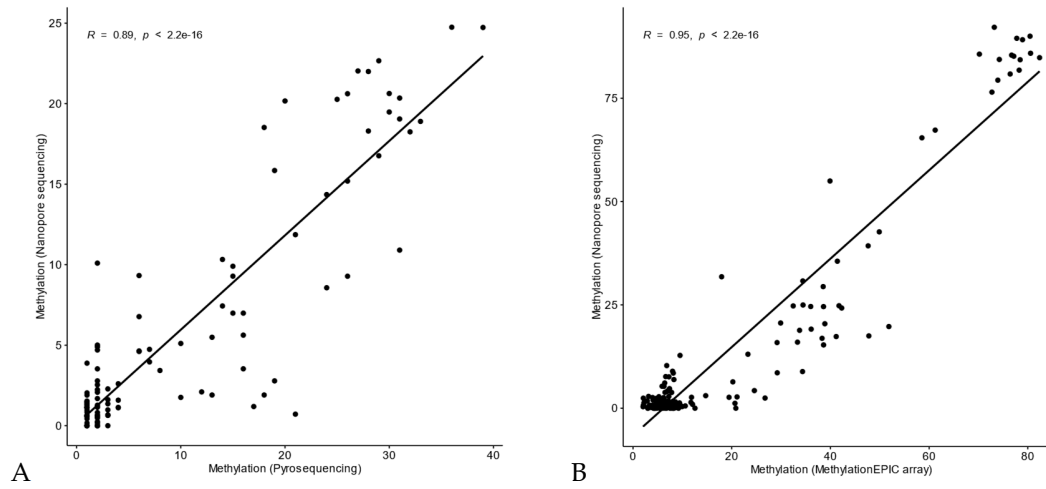

**Supplementary Figure S4:** Pearson's correlation between methylation levels at the overlapping CpGs between nanopore sequencing and (A) pyrosequencing, and (B) EPIC arrays.

Patient 1 - expanded allele

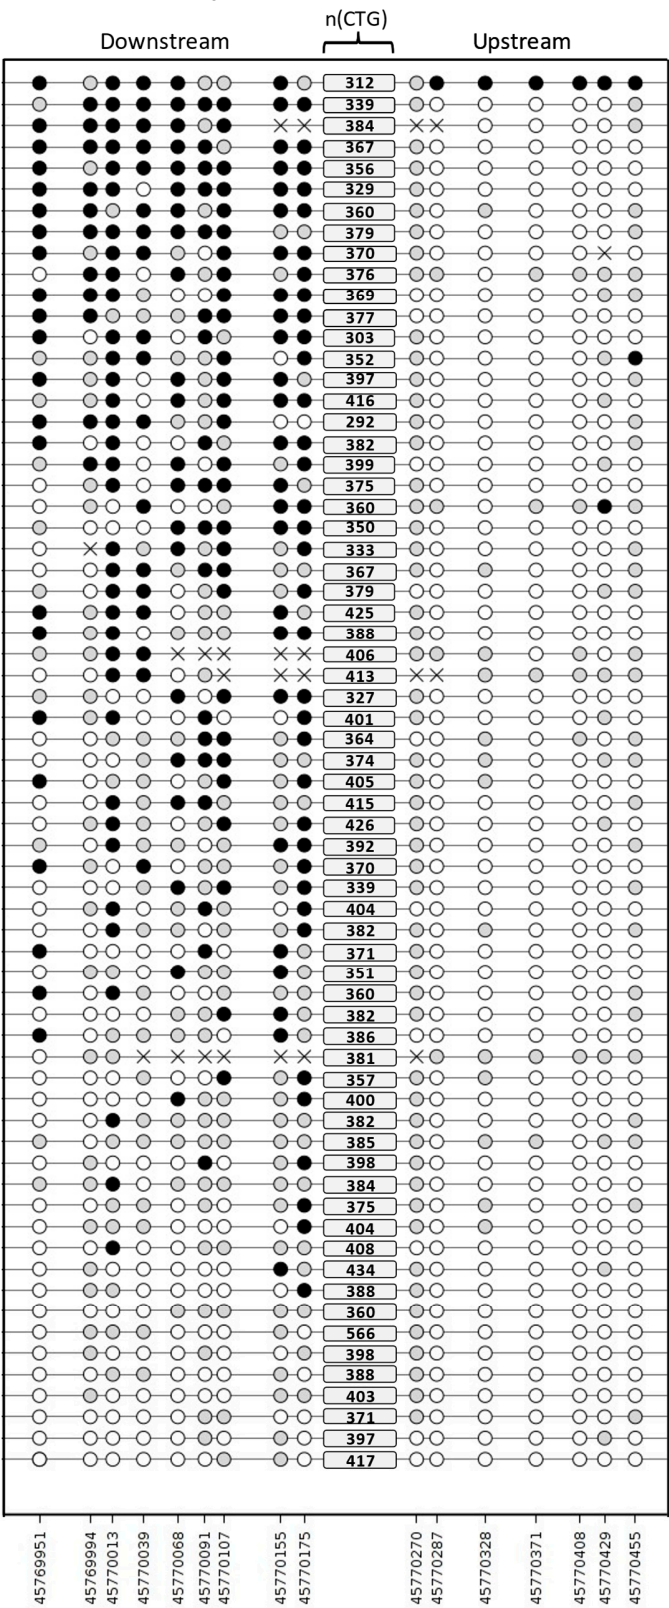

## Patient 2 - expanded allele

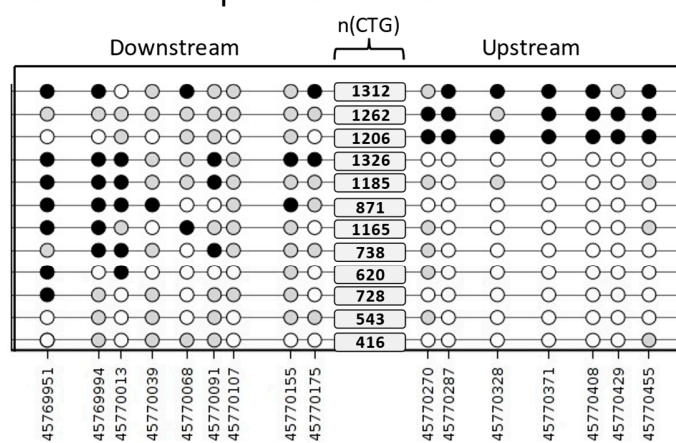

Patient 3 - expanded allele

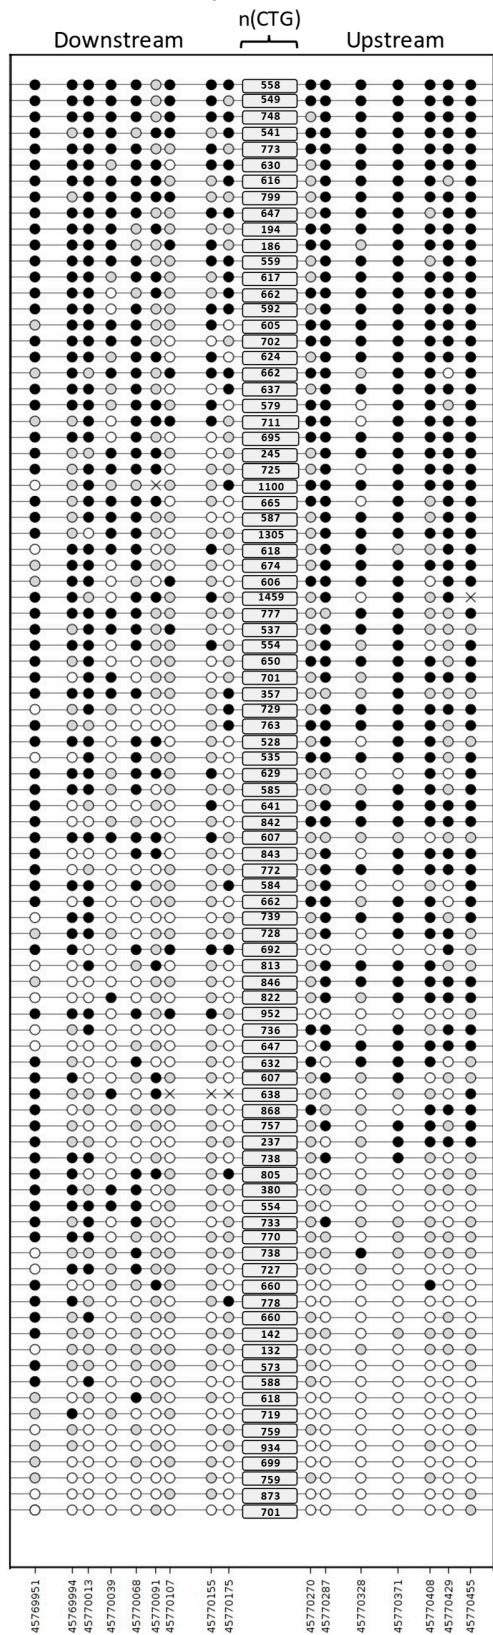

## Patient 4 - expanded allele

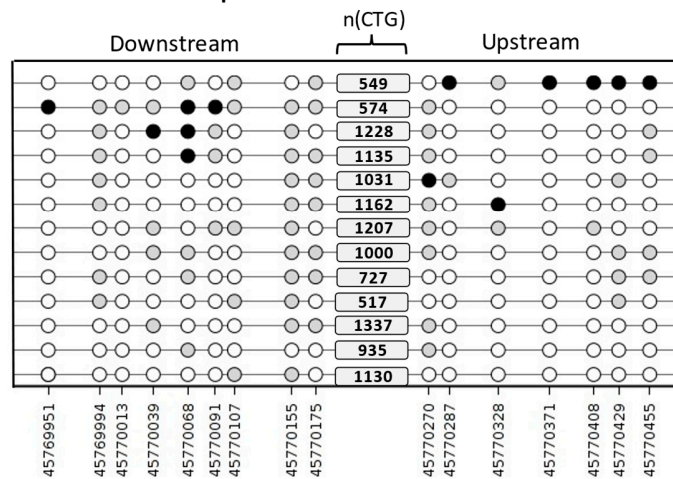

**Supplementary Figure S5:** Nanopolish data of individual reads from CpG sites in close proximity to the CTG-repeat. Note that adjacent sites are collapsed to yield a single score. Black dots: methylated, white: unmethylated, gray: inconclusive, X: no data.
